# Supplementary material for: 3D histology of human heart-forming organoids by X-ray phase-contrast tomography
Source: Springer Nature journal article supplement (doi:10.1038/s42003-025-08876-1), 2025-10-01
Supplement: MOESM3 [file 42003_2025_8876_MOESM3_ESM.pdf › 42003_2025_8876_MOESM3_ESM.pdf]

## **Description of Additional Supplementary Files**

File name- Supplementary Data 1

File description – The source data behind the graph in Fig. 6(c) of the manuscript.
